# Supplementary material for: RNA binding proteins co-localize with small tau inclusions in tauopathy
Source: Springer Nature journal article supplement (doi:10.1186/s40478-018-0574-5), 2018-08-01
Supplement: MOESM1 [file 25666464]

# Supplemental Figure 1.

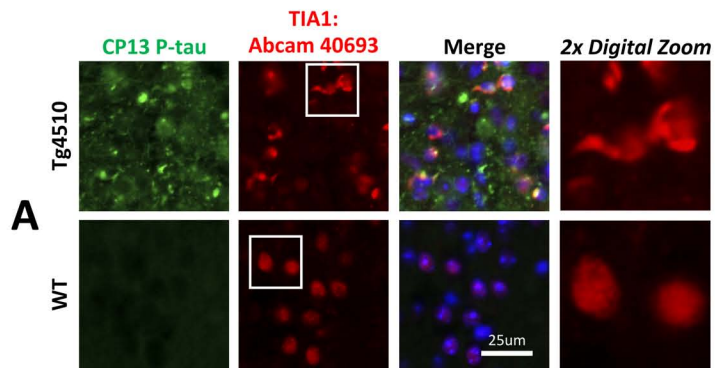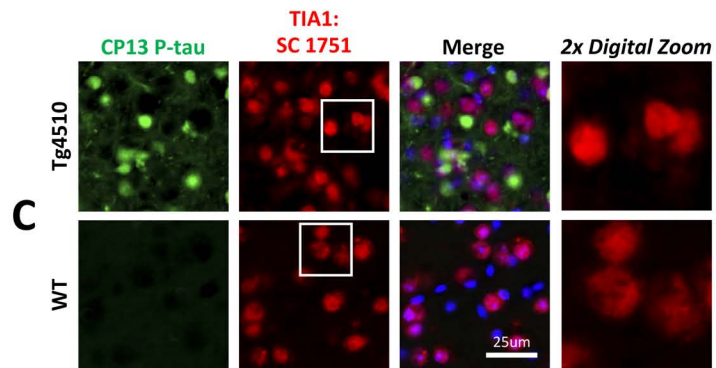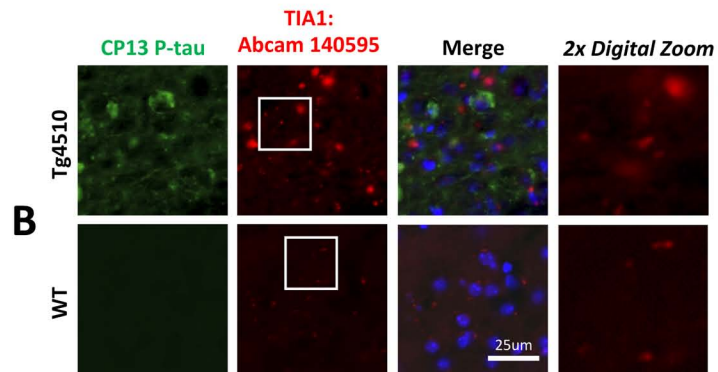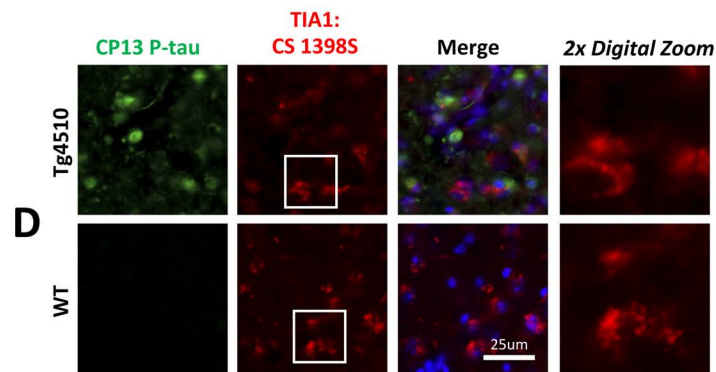

Abcam 40693

Lot GR151575-3

Tg4510

WT

Tg4510

Lot GR311160-1

WT

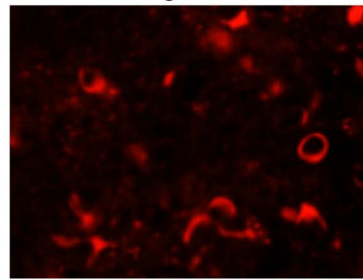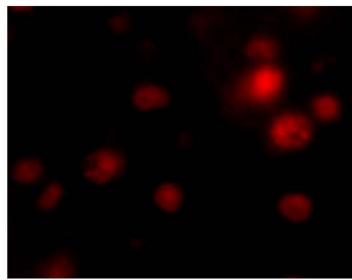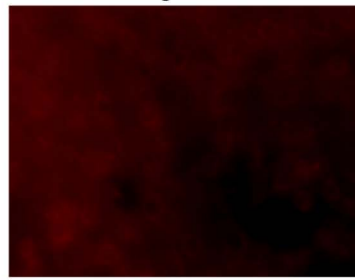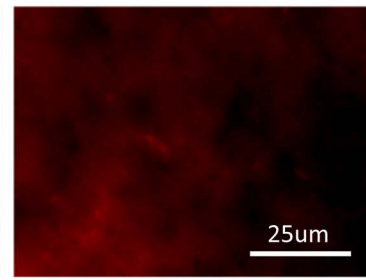

**E**

25um

# Supplemental Figure 2.

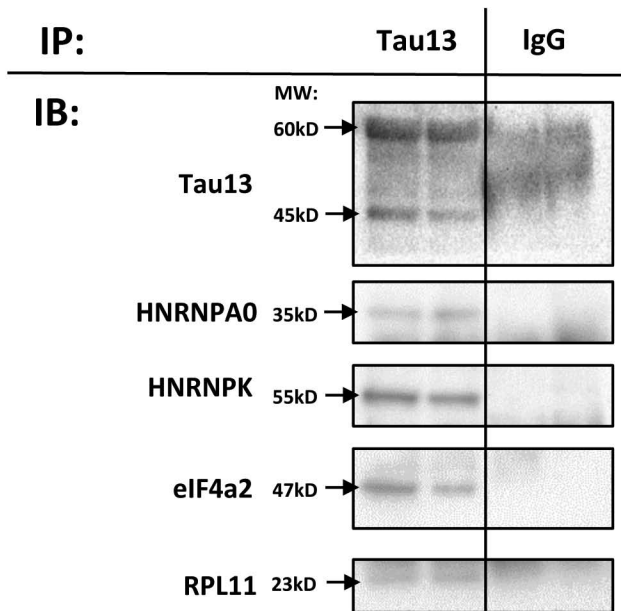

# Supplemental Figure 3.

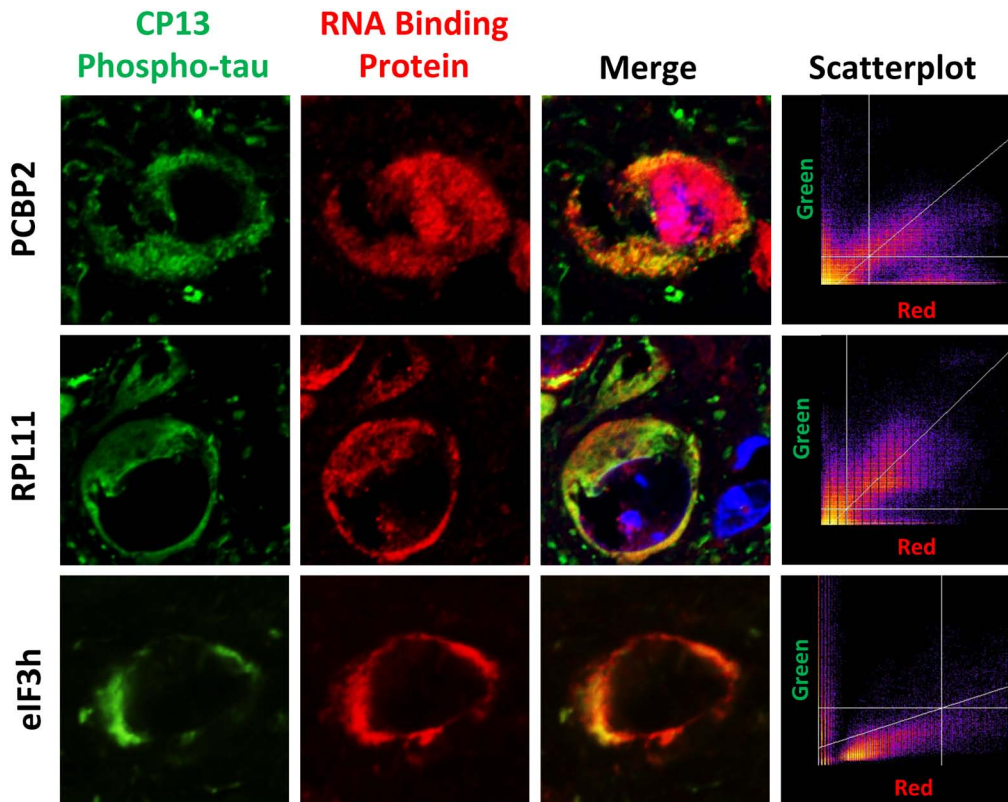

# Supplemental Figure 4.

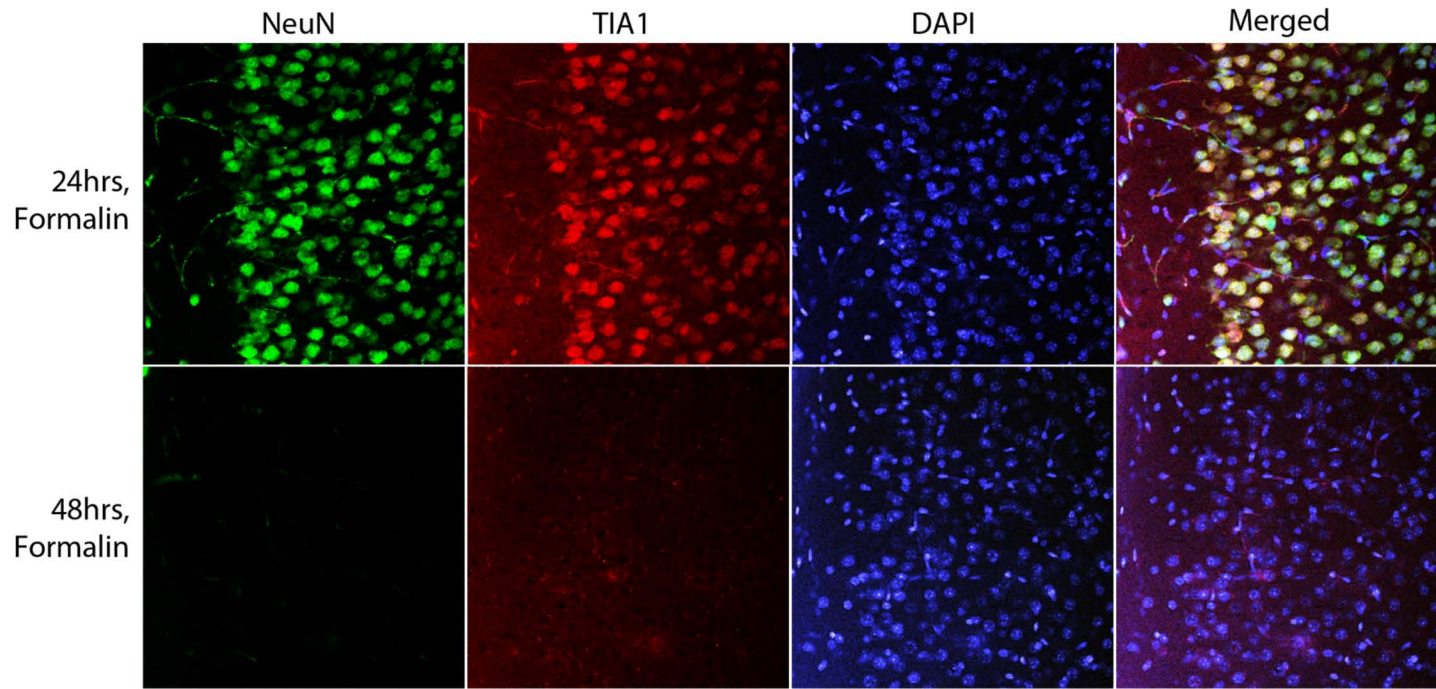

# Supplemental Figure 5.

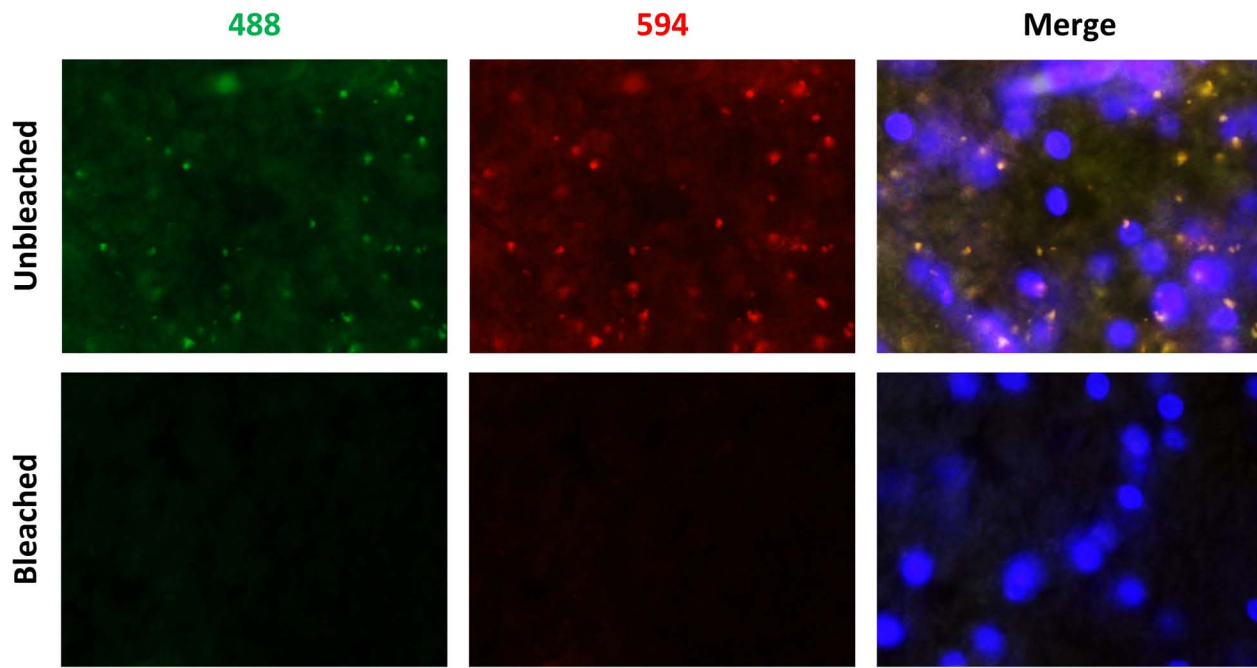

# Supplemental Figure 6.

Mouse rTg4510 Tissue

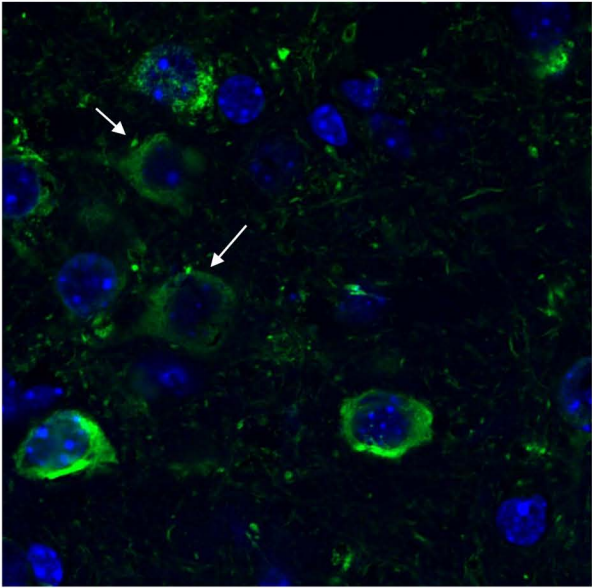

Human AD Tissue

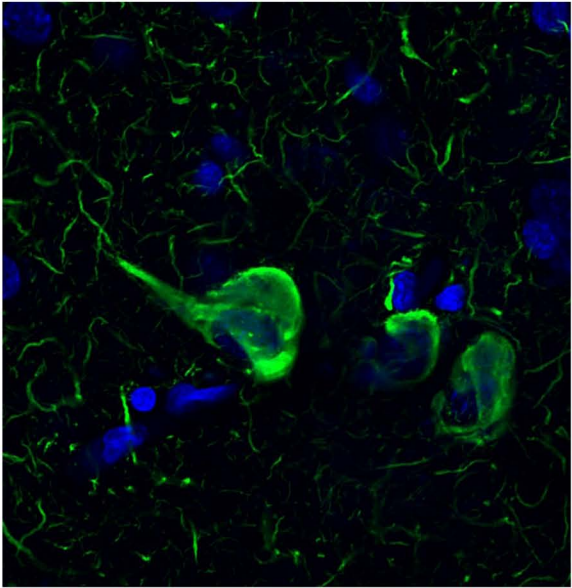

CP13 pTau  
DAPI
